# Supplementary material for: Solution phase synthesis of the less-known Form II crystalline red phosphorus
Source: Royal Society of Chemistry journal article supplement (doi:10.1039/d2qi01019d), 2022-01-01
Supplement: d2qi01019d1.pdf [file d2qi01019d1.pdf]

Supporting information

# Solution phase synthesis of the less-known Form II crystalline red phosphorus

*Zhaojian Sun*<sup>‡</sup>, *Bowen Zhang*<sup>‡</sup>, and *Qingfeng Yan*<sup>\*</sup>

Department of Chemistry, Tsinghua University, Beijing 100084, China

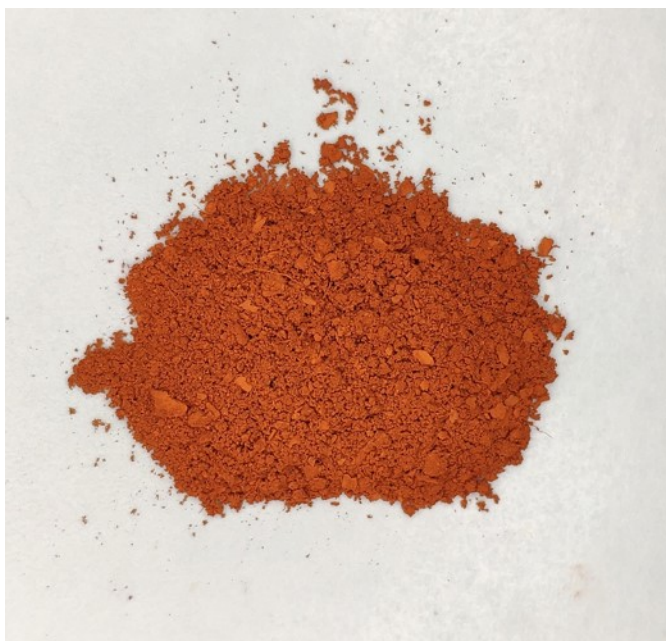

**Figure S1.** Photograph of the Form II RP product synthesized by solvothermal reaction.

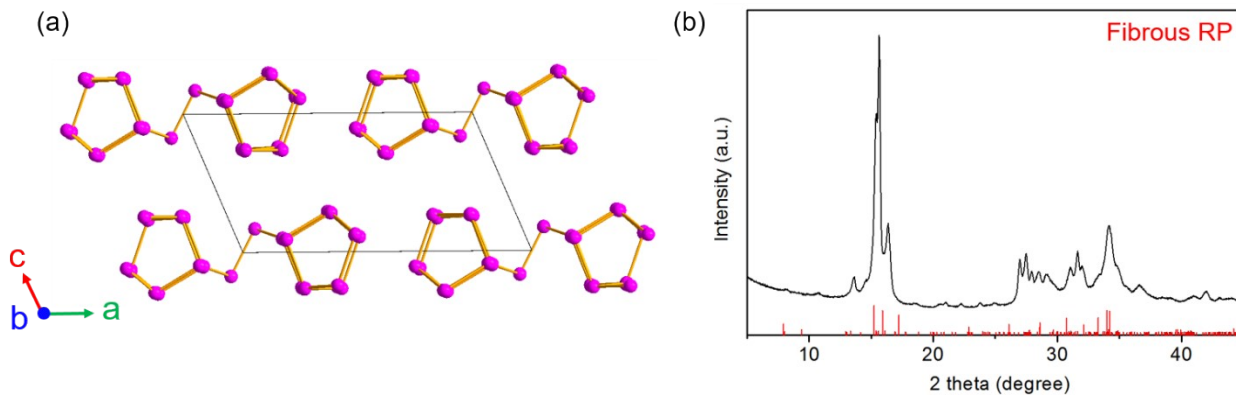

**Figure S2.** (a) Crystal structure and (b) simulated XRD pattern (red lines) of fibrous red phosphorus.<sup>1</sup> The black curve in (b) represents Form II RP.

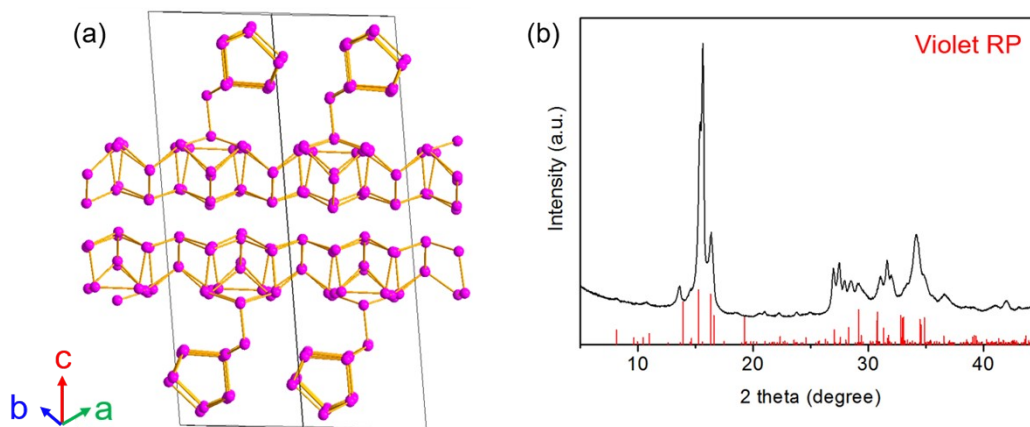

**Figure S3.** (a) Crystal structure and (b) simulated XRD pattern (red lines) of violet red phosphorus (Hittorf's Phosphorus).<sup>2</sup> The black curve in (b) represents Form II RP.

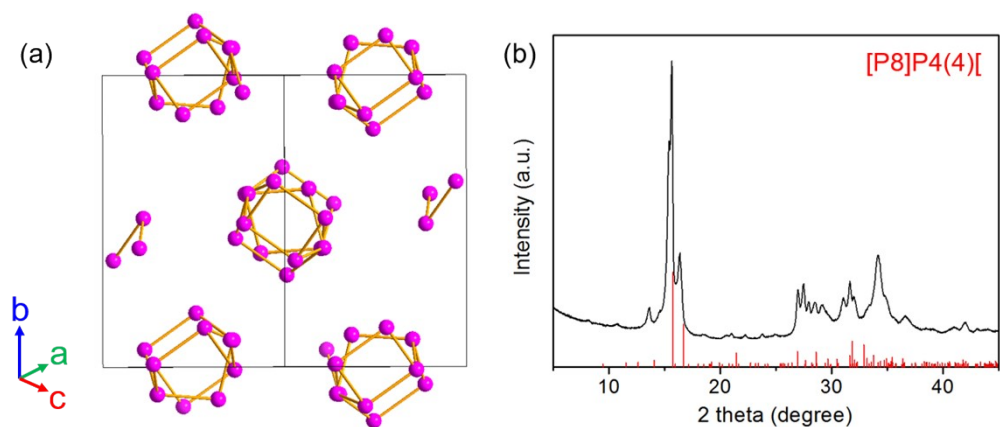

**Figure S4.** (a) Crystal structure and (b) simulated XRD pattern (red lines) of [P8]P4(4).<sup>3</sup> The black curve in (b) represents the measured XRD pattern of the as-synthesized Form II RP.

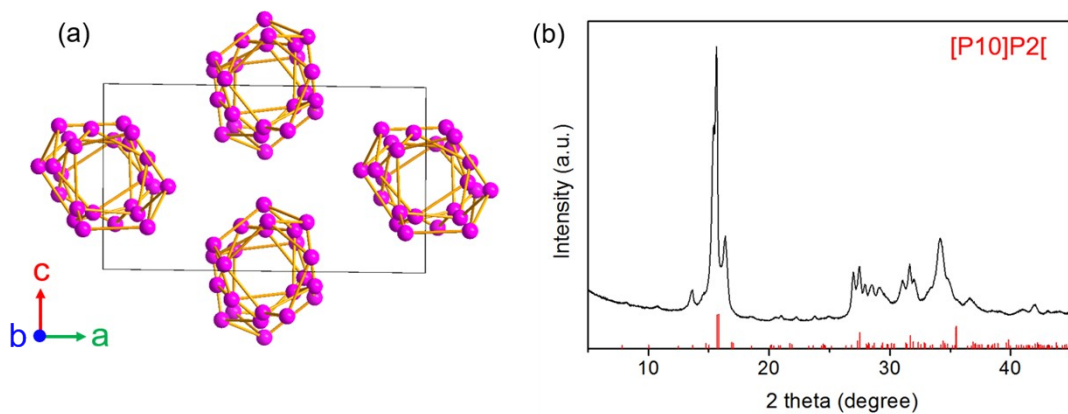

**Figure S5.** (a) Crystal structure and (b) simulated XRD pattern (red lines) of [P10]P2.<sup>3</sup> The black curve in (b) represents Form II RP.

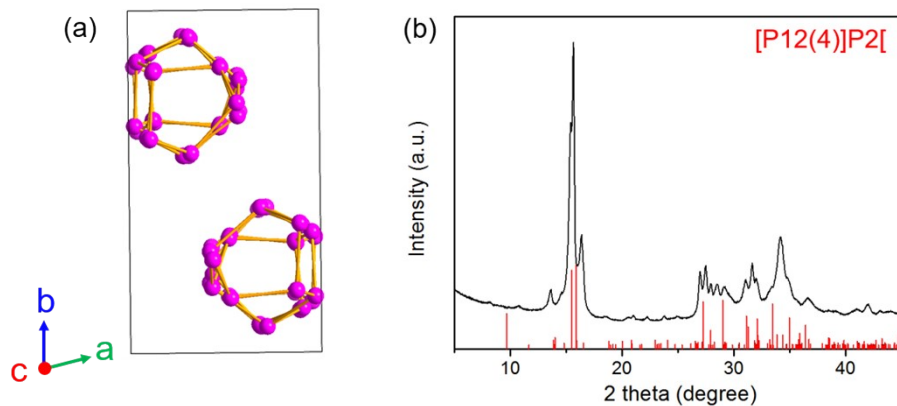

**Figure S6.** (a) Crystal structure and (b) simulated XRD pattern (red lines) of [P12(4)]P2.<sup>3</sup> The black curve in (b) represents Form II RP.

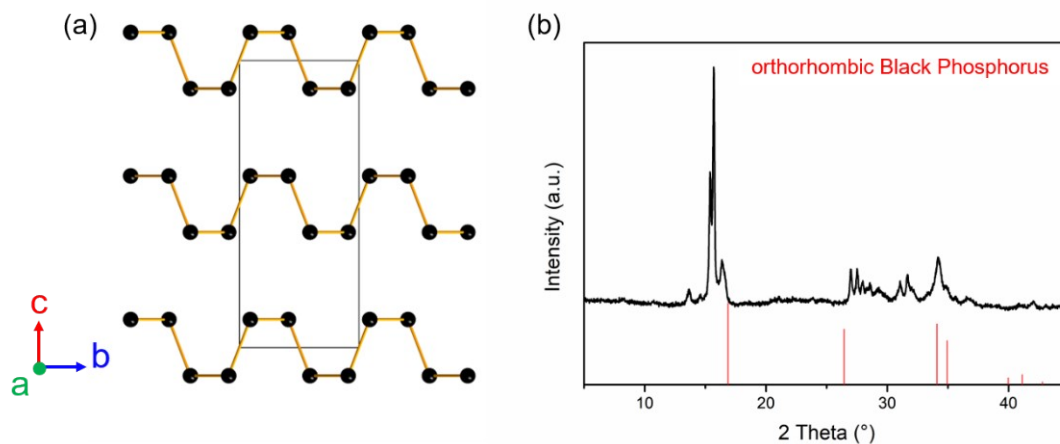

**Figure S7.** (a) Crystal structure and (b) simulated XRD pattern (red lines) of orthorhombic black phosphorus ( $a = 3.3200 \text{ \AA}$ ,  $b = 4.3900 \text{ \AA}$ ,  $c = 10.5200 \text{ \AA}$ ).<sup>4</sup> The black curve in (b) represents Form II RP.

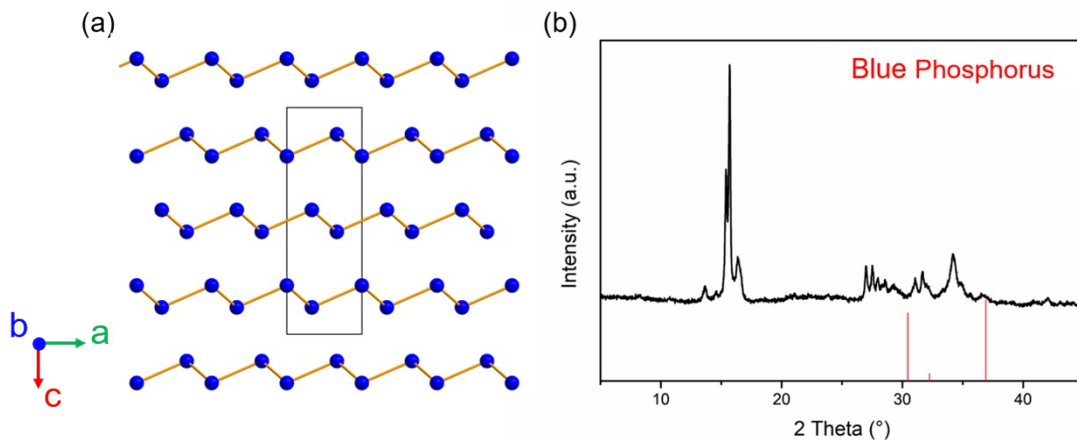

**Figure S8.** (a) Crystal structure and (b) simulated XRD pattern (red lines) of blue phosphorus.<sup>5</sup>

The black curve in (b) represents Form II RP.

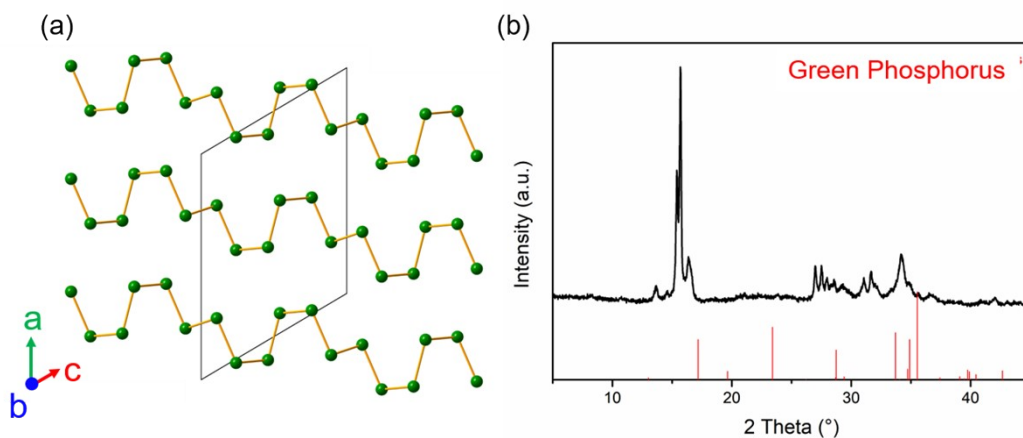

**Figure S9.** (a) Crystal structure and (b) simulated XRD pattern (red lines) of green phosphorus.<sup>6</sup>

The black curve in (b) represents Form II RP.

Additionally, XRD patterns of Form II RP and greenish phosphorus<sup>7</sup> are compared as well. For greenish phosphorus, strong peaks with  $2\theta$  values of  $28.9^\circ$  and  $30.3^\circ$  and weak peaks with  $2\theta$  values of  $22.6^\circ$ ,  $23.7^\circ$ ,  $35.4^\circ$ , and  $37.1^\circ$  apparently do not match the pattern of Form II RP from both the perspective of peak intensity and position.

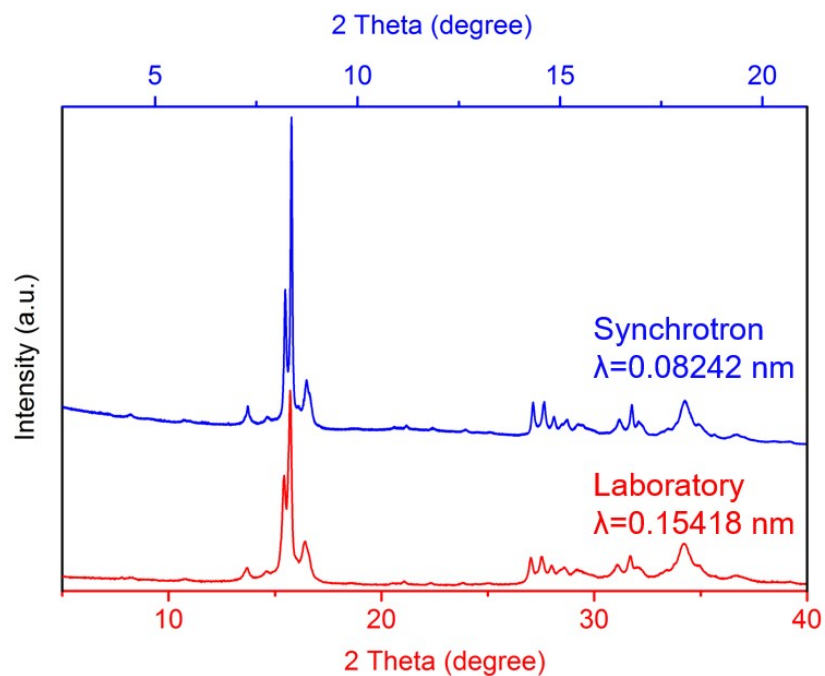

**Figure S10.** Stacked laboratory (LXRD) and synchrotron (SXR) X-ray diffraction pattern for Form II RP.

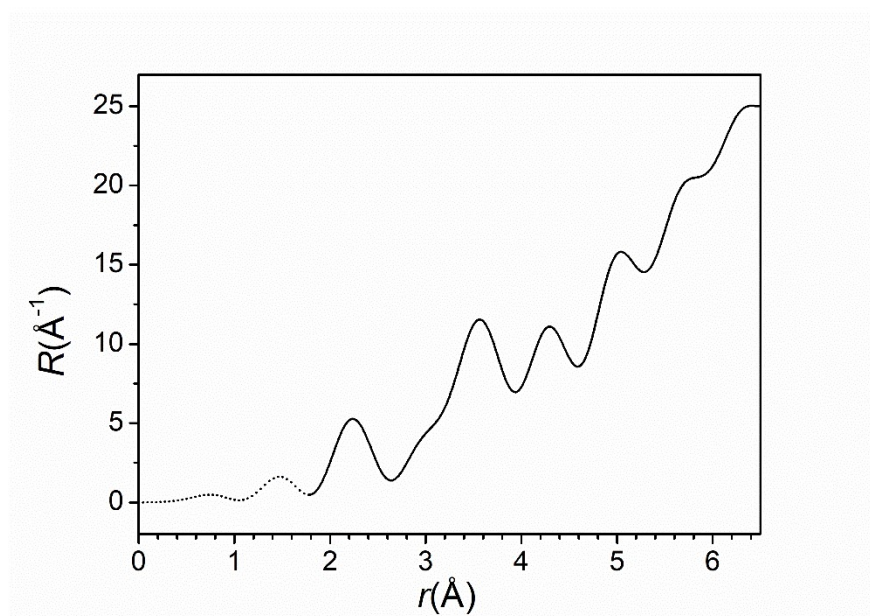

**Figure S11.** Radial distribution function (RDF) of Form II RP.

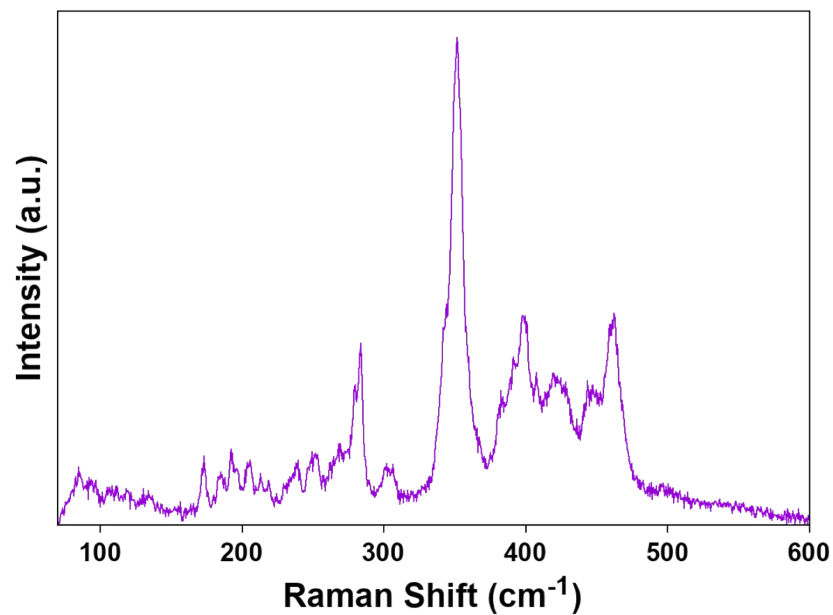

**Figure S12.** Raman spectra of Form II RP.

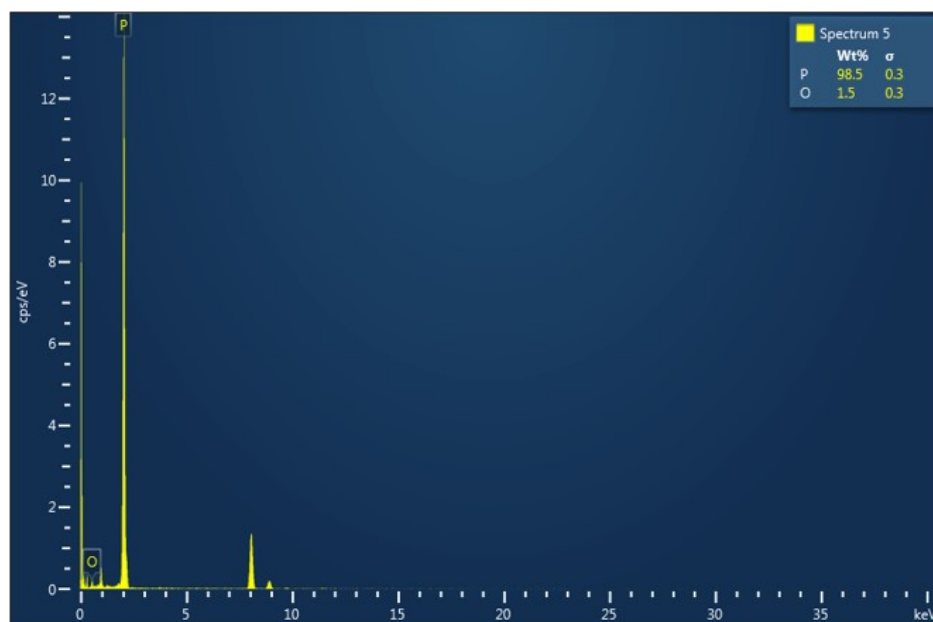

**Figure S13.** The representative EDS spectrum of Form II RP in Figure 2e. (Peaks located at 8.0 eV and 8.9 eV can be attributed to the  $K\alpha$  and  $K\beta$  characteristic X-ray emission lines of Cu grid.)

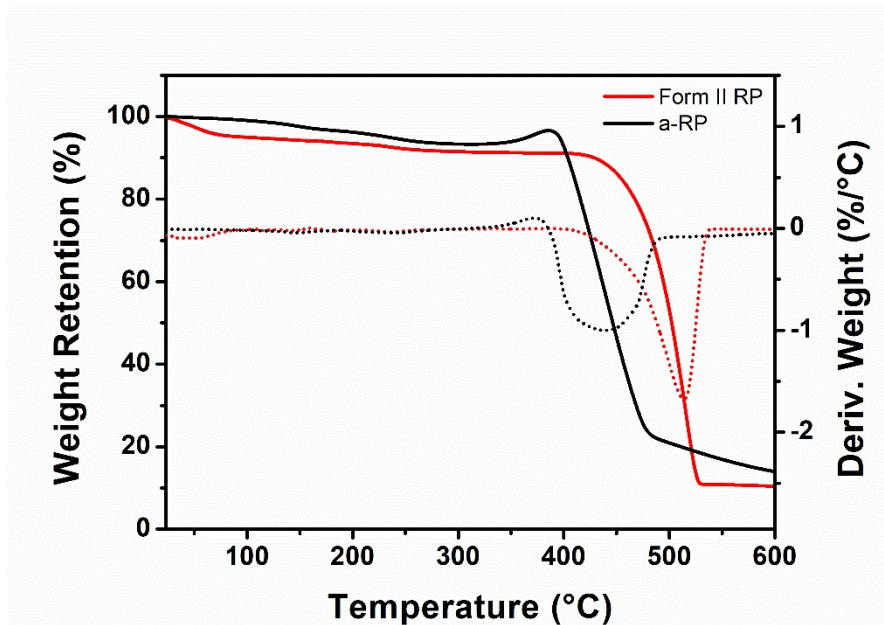

**Figure S14.** TG (solid line) / DTG (dotted line) plot of Form II RP and a-RP from room temperature to 600 °C.

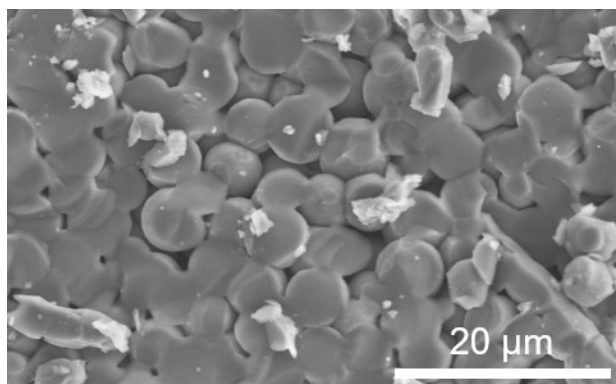

**Figure S15.** SEM image of the ground precursor a-RP. PL characterization was implemented on Form II RP products whose grain size is  $\sim 0.1 \mu\text{m}$  in diameter, while for a-RP the size is around  $5\sim 6 \mu\text{m}$  in characteristic length (Figure 2a).



**Table S1.** Fitting parameters of the TRPL decay curves of Form II RP.

| Sample     | $A_1$ | $\tau_1$ (ps) | $A_2$ | $\tau_2$ (ps) | $\tau_{av}^*$ (ps) |
|------------|-------|---------------|-------|---------------|--------------------|
| Form II RP | 1.430 | 5.440         | 0.005 | 296.6         | 52.07              |

\* Note: The average photoluminescence lifetime was calculated by  $\tau_{av} = \frac{\sum_i A_i \tau_i^2}{\sum_i A_i \tau_i}$ .

#### References

- 1 M. Ruck, D. Hoppe, B. Wahl, P. Simon, Y. Wang and G. Seifert, Fibrous red phosphorus, *Angew. Chem. Int. Ed.*, 2005, **44**, 7616-7619.
- 2 H. Thurn and H. Krebs, Über Struktur und Eigenschaften der Halbmetalle. XXII. Die Kristallstruktur des Hittorfschen Phosphors, *Acta Crystallogr., Sect. B: Struct. Crystallogr. Cryst. Chem.*, 1969, **25**, 125-135.
- 3 S. Böcker and M. Häser, Covalent structures of phosphorus: a comprehensive theoretical study, *Z. Anorg. Allg. Chem.*, 1995, **621**, 258-286.
- 4 R. Hultgren, N. S. Gingrich and B. E. Warren, The atomic distribution in red and black phosphorus and the crystal structure of black phosphorus, *J. Chem. Phys.*, 1935, **3**, 351-355.
- 5 J. C. Jamieson, Crystal structures adopted by black phosphorus at high pressures, *Science*, 1963, **139**, 1291-1292.

- 6 W. H. Han, S. Kim, I.-H. Lee and K. J. Chang, Prediction of green phosphorus with tunable direct band gap and high mobility, *J. Phys. Chem. Lett.*, 2017, **8**, 4627-4632.
- 7 H. Wang, C. Liu, H. Wang, X. Han, S. Zhang, J. Sun, Y. Zhang, Y. Cao, Y. Yao and J. Sun, The synthesis of greenish phosphorus on carbon substrates, *Chem. Commun.*, 2021, **57**, 3975-3978.
